# Supplementary material for: Template-assisted synthesis of ordered single crystal InN nanowires
Source: Royal Society of Chemistry journal article supplement (doi:10.1039/c2ra20509b), 2012-01-01
Supplement: c2ra20509b.pdf [file c2ra20509b.pdf]

## Supporting Information

### Template-assisted synthesis of ordered single crystal InN nanowires

Zhuo Chen\*<sup>1</sup>, Yanan Li<sup>1</sup>, Jie Jiang<sup>1</sup>, Chuanbao Cao\*<sup>1</sup>, Tingting Xu<sup>2</sup>, Qing Chen<sup>2</sup>, Xingyan Xu<sup>1</sup>, and Hesun Zhu<sup>1</sup>

<sup>1</sup>Research Center of Materials Science, Beijing Institute of Technology, Beijing 100081, People's Republic of China

<sup>2</sup>Key Laboratory for the Physics and Chemistry of Nanodevices and Department of Electronics, Peking University, Beijing 100871, People's Republic of China.

The involved formulas are given as following:

$$\Delta G_T^\ominus = \Delta H_T^\ominus - T\Delta S_T^\ominus \quad (1),$$

$$\Delta H_T^\ominus = \Delta H_{298}^\ominus + \int_{298}^T \Delta C_p dT \quad (2),$$

$$\Delta S_T^\ominus = \Delta S_{298}^\ominus + \int_{298}^T \frac{\Delta C_p}{T} dT \quad (3),$$

$$\Delta H_{298}^\ominus = \sum v_i \Delta H_{298,i}^\ominus, \quad \Delta S_{298}^\ominus = \sum v_i \Delta S_{298,i}^\ominus, \quad \Delta C_p = \sum v_i \Delta C_{p,i} \quad (4).$$

The related thermodynamic data are given in Table S1.

Table S1 The involved thermodynamic data in reactions (1) and (2) [1].

| Substance                      | $\Delta S_{298}(\text{J}/(\text{Kmol}))$ | $-\Delta H_{298}(\text{kJ}/\text{mol})$ | A      | B     | C      |
|--------------------------------|------------------------------------------|-----------------------------------------|--------|-------|--------|
| InN                            | 43.5                                     | 138.1                                   | 38.07  | 12.13 | ---    |
| In <sub>2</sub> O <sub>3</sub> | 107.9                                    | 925.9                                   | 121.34 | 13.39 | -30.12 |
| In (s)                         | 57.8                                     | 0.0                                     | 24.31  | 10.46 | ---    |
| H <sub>2</sub> O(g)            | 188.7                                    | 241.8                                   | 30.00  | 10.71 | 0.33   |
| H <sub>2</sub> (g)             | 130.6                                    | 0.0                                     | 27.37  | 3.33  | 0.50   |
| NH <sub>3</sub> (g)            | 192.7                                    | 45.9                                    | 25.80  | 31.63 | 0.35   |

where s-solid, l-liquid, g-gas, and  $C_p = A + B \cdot 10^{-3}T + C \cdot 10^5 T^{-2}$

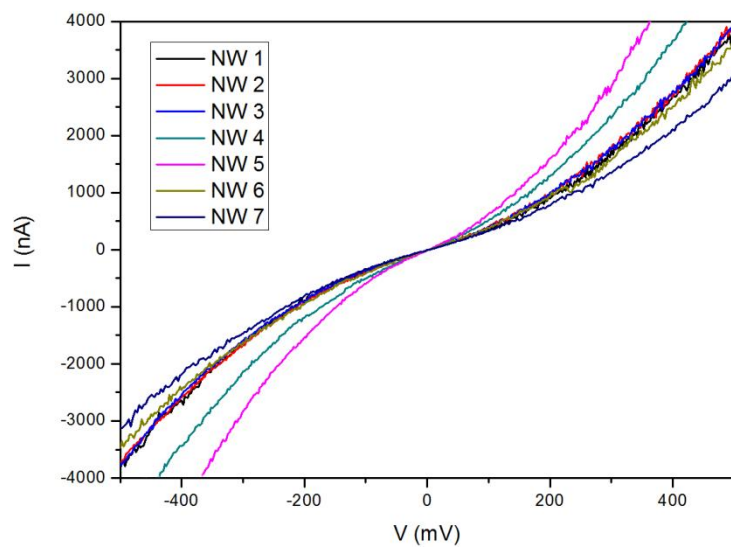

Figure S1. I-V curves of 7 nanowires

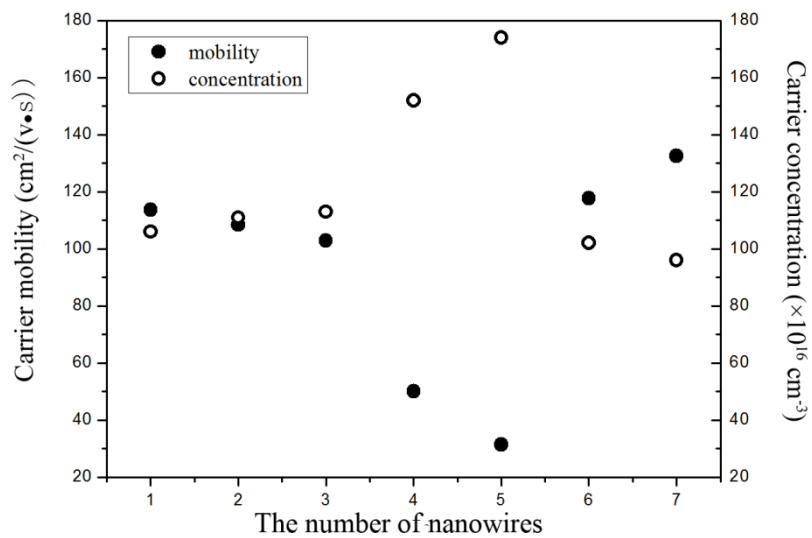

Figure S2. The intrinsic parameters of 7 nanowires.

#### Reference

- (1) O. Kubaschewski, C. B. Alcock and P. J. Spencer, Materials Thermochemistry, Pergamon Press, Oxford 1993.
